# Supplementary material
Source: publisher figshare collection journal article supplement (https://frontiersin.figshare.com/ndownloader/files/26208509)

Image title

HMM Density map

Oppermann

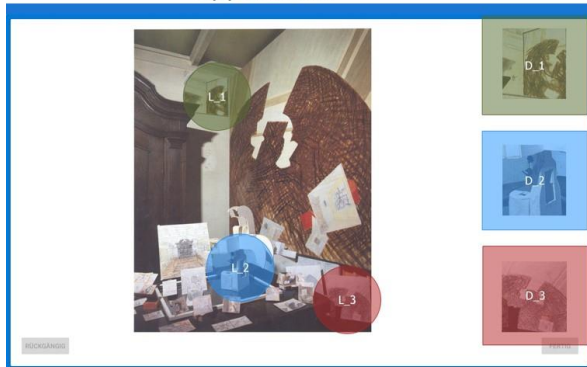

Non-expert group

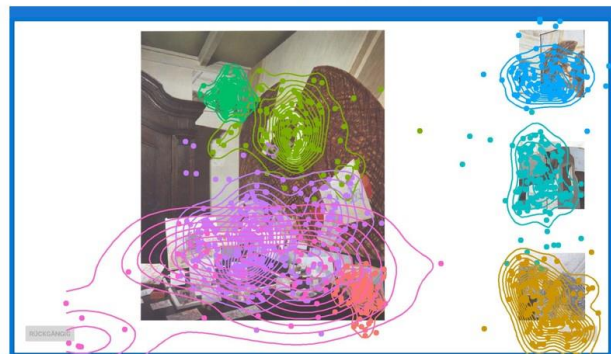

Expert group

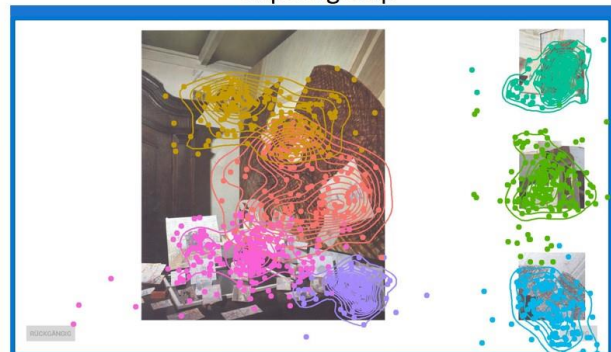

Footprints

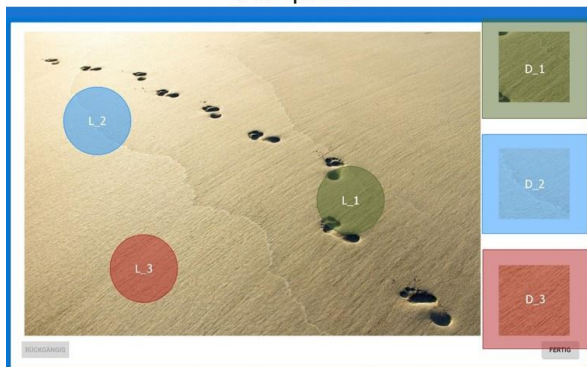

Non-expert group

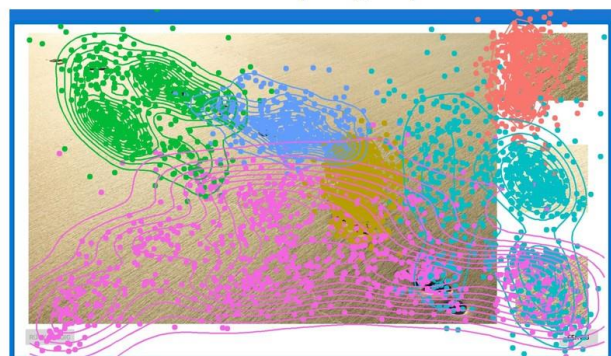

Expert group

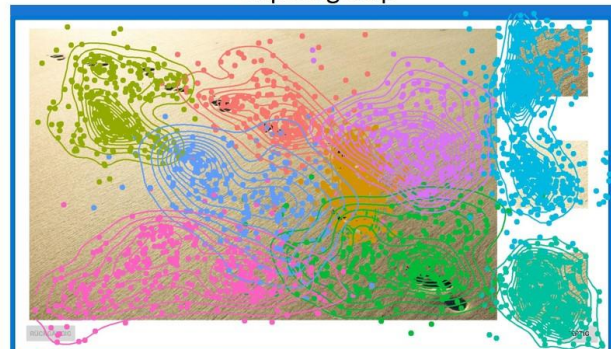

Spider Net

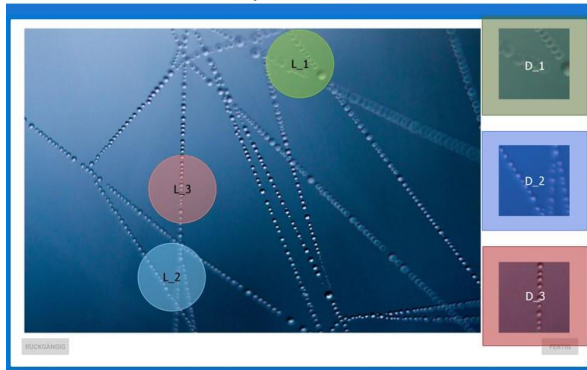

Non-expert group

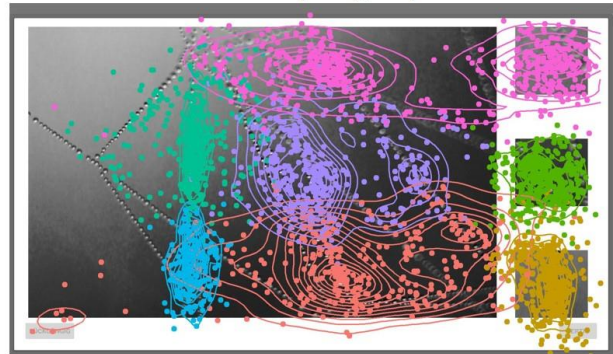

Expert group

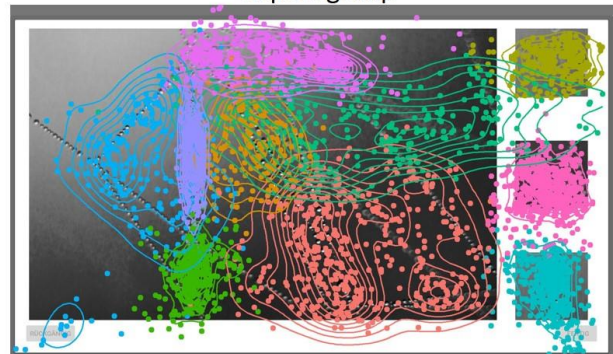

Easter

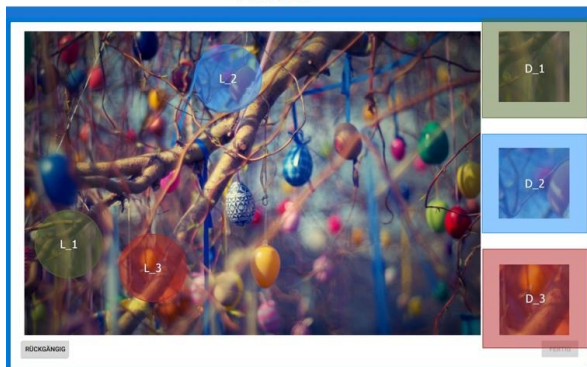

Non-expert group

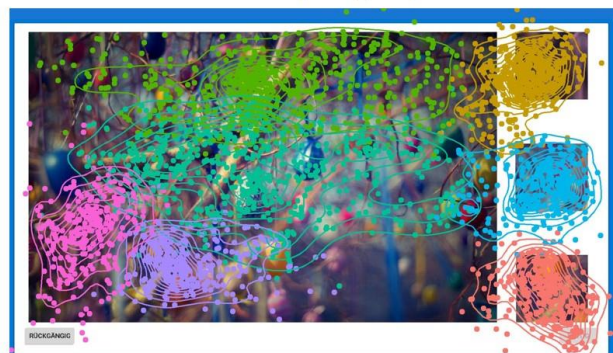

Expert group

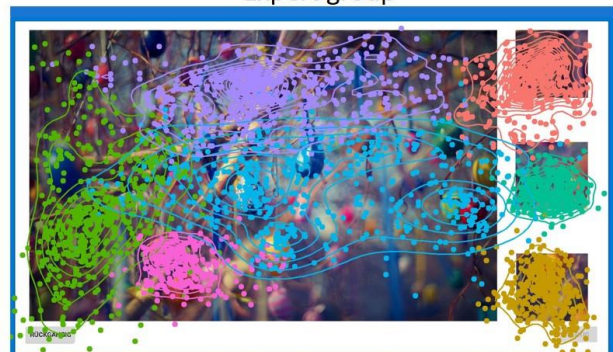

Abbey

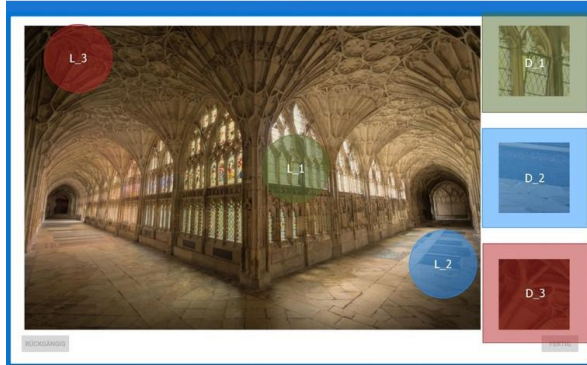

Non-expert group

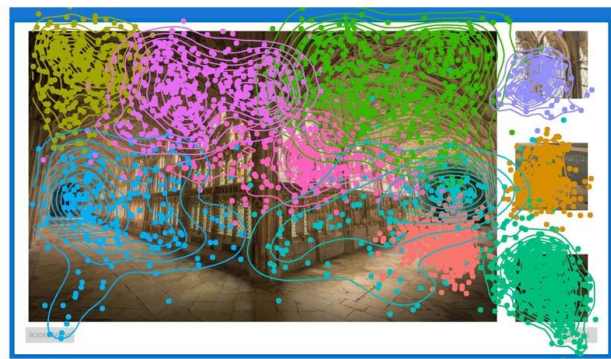

Expert group

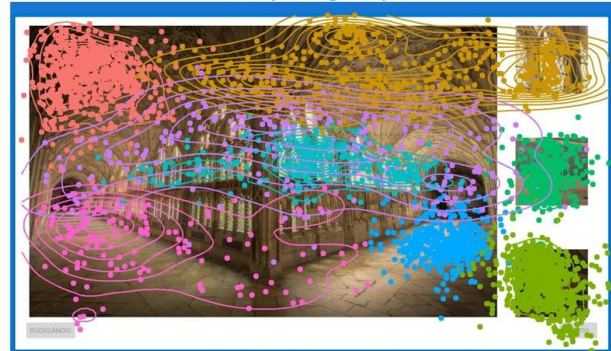

Clock & Graffiti

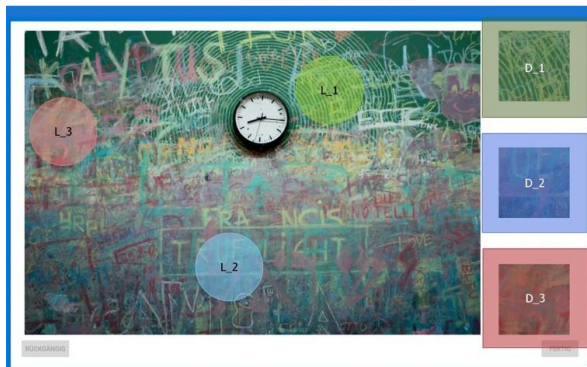

Non-expert group

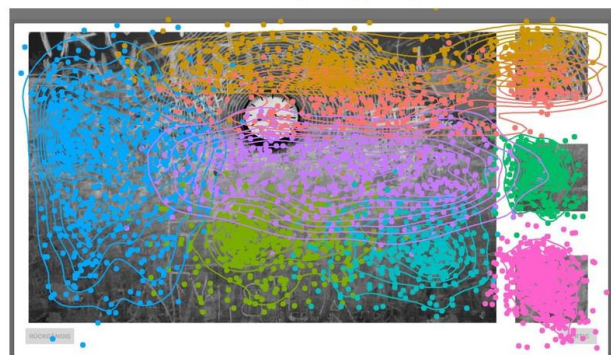

Expert group

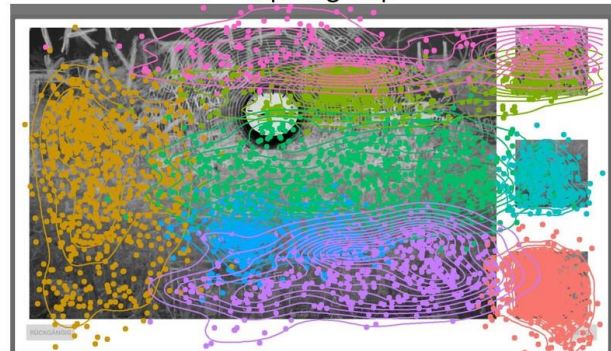

Glasshouse

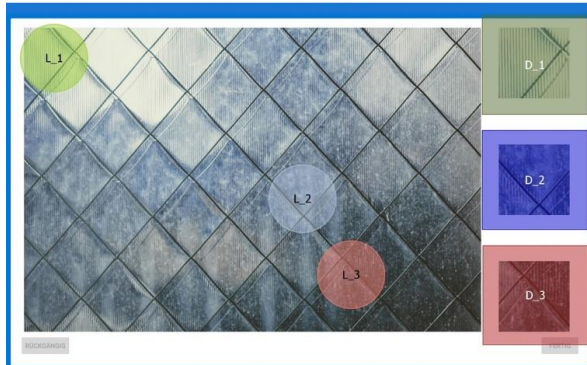

Non-expert group

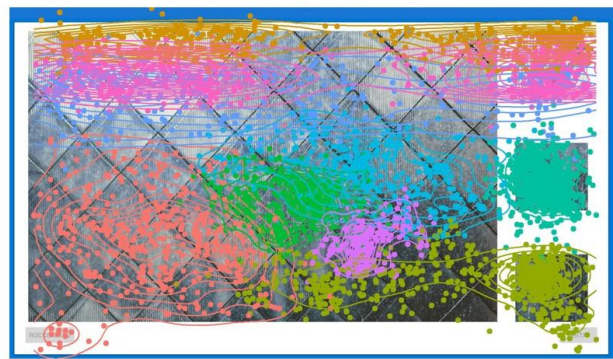

Expert group

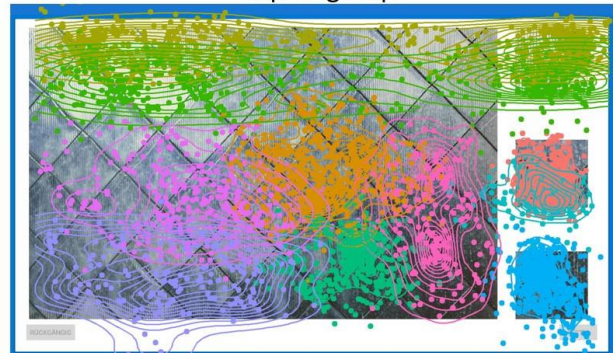

Linocut Pattern

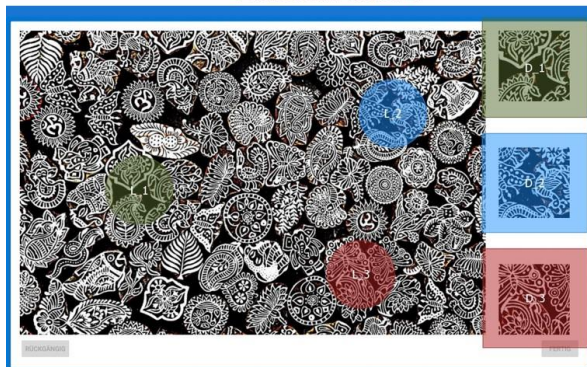

Non-expert group

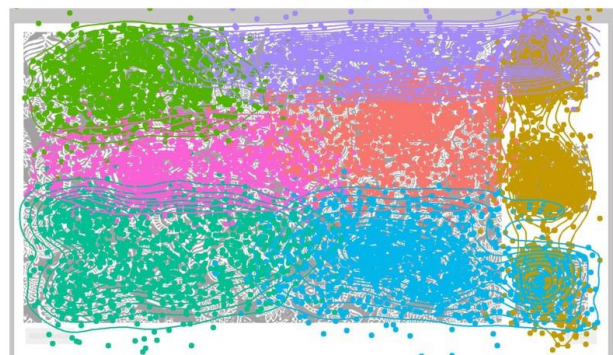

Expert group

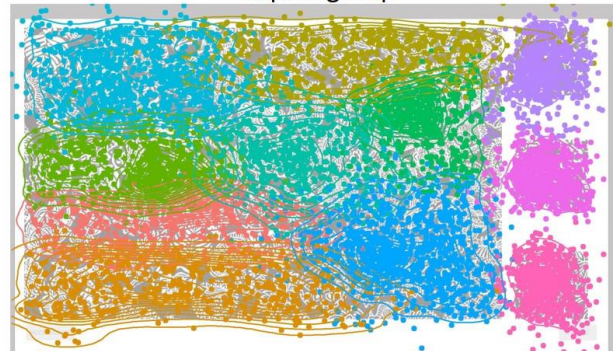

Supplement: Supplementary file [file 26208509]
